# Supplementary material for: Characterizing Water Composition with an Autonomous Robotic Team Employing Comprehensive In Situ Sensing, Hyperspectral Imaging, Machine Learning, and Conformal Prediction
Source: MDPI journal article supplement (doi:10.3390/rs16060996), 2024-03-12
Supplement: s1 [file s1]

# Supplementary Material:

## Hyperspectral Reflectance Indices

John Waczak

2024-01-03

For the following hyperspectral reflectance indices, we have made the following identifications:

$$\begin{aligned} R_b &= R(440 \text{ nm}) \\ R_g &= R(550 \text{ nm}) \\ R_r &= R(650 \text{ nm}) \\ R_{nir} &= R(860 \text{ nm}). \end{aligned} \tag{1}$$

We also define  $R_{far} = R(1009 \text{ nm})$  as the band representing the farthest infrared bin for our hyperspectral imager which we use instead of the usual SWIR band.

Table S 1: Spectral indices supplied as extra features to each ML model. For each index,  $R_\lambda$  denotes the reflectance at wavelength  $\lambda$  used to compute the index.  $R_b$ ,  $R_g$ , etc are defined in Equation 1.

| Spectral Index                        | Acronym | Formula                                                                           |
|---------------------------------------|---------|-----------------------------------------------------------------------------------|
| Difference Vegetation Index           | DVI     | $\frac{2.5(R_{nir} - R_r)}{R_{nir} + 6R_r - 7.5R_b + 1}$                          |
| Global Environmental Monitoring Index | GEMI*   | $\text{eta}(1 - 0.25 \text{ eta}) - \frac{R_r - 1.125}{1 - R_r}$                  |
| Green Atmospherically Resistant Index | GARI**  | $\frac{R_{nir} - (R_g - \gamma(R_b - R_r))}{R_{nir} + (R_g - \gamma(R_b - R_r))}$ |
| Green Chlorophyll Index               | GCI     | $\frac{R_{nir}}{R_g} - 1$                                                         |
| Green Difference Vegetation Index     | GDVI    | $\frac{R_{nir} - R_g}{(R_g - R_r) + (R_g - R_b)}$                                 |
| Green Leaf Index                      | GLI     | $\frac{(R_g - R_r) + (R_g - R_b)}{2R_g + R_r + R_b}$                              |

| Spectral Index                                 | Acronym | Formula                                                                                   |
|------------------------------------------------|---------|-------------------------------------------------------------------------------------------|
| Green Normalized Difference Vegetation Index   | GNDVI   | $\frac{R_{nir} - R_g}{R_{nir} + R_g}$                                                     |
| Green Optimized Soil Adjusted Vegetation Index | GOSAVI  | $\frac{R_{nir} - R_g}{R_{nir} + R_g + 0.16}$                                              |
| Green Ratio Vegetation Index                   | GRVI    | $\frac{R_{nir}}{R_g}$                                                                     |
| Green Soil Adjusted Vegetation Index           | GSAVI   | $\frac{1.5(R_{nir} - R_g)}{R_{nir} + R_g + 0.5}$                                          |
| Infrared Percentage Vegetation Index           | IPVI    | $\frac{R_{nir}}{R_{nir} + R_r}$                                                           |
| Leaf Area Index                                | LAI     | $3.618 \left( \frac{2.5(R_{nir} - R_r)}{R_{nir} + 6R_{R_r} - 7.5R_b + 1} \right) - 0.118$ |
| Modified Non-Linear Index                      | MNLI    | $\frac{1.5(R_{nir}^2 - R_r)}{R_{nir}^2 + R_r + 0.5}$                                      |
| Modified Soil Adjusted Vegetation Index 2      | MSAVI2  | $\frac{2R_{nir} + 1 - \sqrt{(2R_{nir} + 1)^2 - 8(R_{nir} - R_r)}}{2}$                     |
| Modified Simple Ratio                          | MSR     | $\frac{R_{nir}/R_r - 1}{\sqrt{R_{nir}/R_r} + 1}$                                          |
| Non-Linear Index                               | NLI     | $\frac{R_{nir}^2 - R_r}{R_{nir}^2 + R_r}$                                                 |
| Normalized Difference Vegetation Index         | NDVI    | $\frac{R_{nir} - R_r}{R_{nir} + R_r}$                                                     |
| Normalized Pigment Chlorophyll Index           | NPCI    | $\frac{R_{680} - R_{430}}{R_{680} + R_{430}}$                                             |
| Optimized Soil Adjusted Vegetation Index       | OSAVI   | $\frac{R_{nir} - R_r}{R_{nir} + R_r + 0.16}$                                              |
| Renormalized Difference Vegetation Index       | RDVI    | $\frac{R_{nir} - R_r}{\sqrt{R_{nir} + R_r}}$                                              |
| Soil Adjusted Vegetation Index                 | SAVI    | $\frac{1.5(R_{nir} - R_r)}{R_{nir} + R_r + 0.5}$                                          |
| Simple Ratio                                   | SR      | $\frac{R_{nir}}{R_r}$                                                                     |
| Transformed Difference Vegetation Index        | TDVI    | $\frac{1.5R_{nir} - R_r}{\sqrt{R_{nir}^2 + R_r + 0.5}}$                                   |
| Triangular Greenness Index                     | TGI     | $\frac{(\lambda_r - \lambda_b)(R_r - R_g) - (\lambda_r - \lambda_g)(R_r - R_b)}{2}$       |

| Spectral Index                                           | Acronym | Formula                                                                                                                     |
|----------------------------------------------------------|---------|-----------------------------------------------------------------------------------------------------------------------------|
| Visible Atmospherically Resistant Index                  | VARI    | $\frac{R_g - R_r}{R_g + R_r - R_b}$                                                                                         |
| Wide Dynamic Range Vegetation Index                      | WDRVI   | $\frac{0.2R_{nir} - R_r}{0.2 * R_{nir} + R_r}$                                                                              |
| Atmospherically Resistant Vegetation Index               | ARVI    | $\frac{R_{800} - (R_{800} - 1(R_{450} - R_{680}))}{R_{800} + (R_{680} - 1(R_{450} - R_{680}))}$                             |
| Modified Chlorophyll Absorption Ratio Index              | MCARI   | $((R_{700} - R_{670}) - 2(R_{700} - R_{550})) \frac{R_{700}}{R_{670}}$                                                      |
| Modified Chlorophyll Absorption Ratio Index Improved     | MCARI2  | $\frac{1.5(2.5(R_{800} - R_{670}) - 1.3(R_{800} - R_{550}))}{\sqrt{(2R_{800} + 1)^2 - (6R_{800} - 5\sqrt{R_{670}}) - 0.5}}$ |
| Modified Red Edge Normalized Difference Vegetation Index | MRENDVI | $\frac{R_{750} - R_{705}}{R_{750} + R_{705} - 2R_{445}}$                                                                    |
| Modified Red Edge Simple Ratio                           | MRESR   | $\frac{R_{750} - R_{445}}{R_{705} - R_{445}}$                                                                               |
| Modified Triangular Vegetation Index                     | MTVI    | $1.2(1.2(R_{800} - R_{550}) - 2.5(R_{670} - R_{550}))$                                                                      |
| Red Edge Normalized Difference Vegetation Index          | RENDVI  | $\frac{R_{750} - R_{705}}{R_{750} + R_{705}}$                                                                               |
| Transformed Chlorophyll Absorption Reflectance Index     | TCARI   | $3 \left( (R_{700} - R_{670}) - 0.2(R_{700} - R_{550}) \frac{R_{700}}{R_{670}} \right)$                                     |
| Triangular Vegetation Index                              | TVI     | $0.5(120(R_{750} - R_{550}) - 200(R_{670} - R_{550}))$                                                                      |
| Vogelmann Red Edge Index 1                               | VREI1   | $\frac{R_{740}}{R_{720}}$                                                                                                   |
| Vogelmann Red Edge Index 2                               | VREI2   | $\frac{R_{734} - R_{747}}{R_{715} + R_{726}}$                                                                               |
| Vogelmann Red Edge Index 3                               | VREI3   | $\frac{R_{734} - R_{747}}{R_{715} + R_{720}}$                                                                               |
| Photochemical Reflectance Index                          | PRI     | $\frac{R_{531} - R_{570}}{R_{531} + R_{570}}$                                                                               |
| Structure Insensitive Pigment Index                      | SIPI    | $\frac{R_{800} - R_{445}}{R_{800} + R_{680}}$                                                                               |
| Structure Independent Pigment Index                      | SIPI1   | $\frac{R_{445} - R_{800}}{R_{670} - R_{800}}$                                                                               |
| Plant Senescence Reflectance Index                       | PSRI    | $\frac{R_{680} - R_{500}}{R_{750}}$                                                                                         |
| Anthocyanin Reflectance Index 1                          | ARI1    | $\frac{1}{R_{550}} - \frac{1}{R_{700}}$                                                                                     |
| Anthocyanin Reflectance Index 2                          | ARI2    | $\left( \frac{1}{R_{550}} - \frac{1}{R_{700}} \right) R_{800}$                                                              |

| Spectral Index                             | Acronym | Formula                                                        |
|--------------------------------------------|---------|----------------------------------------------------------------|
| Carotenoid Reflectance Index 1             | CRI1    | $\frac{1}{R_{510}} - \frac{1}{R_{550}}$                        |
| Carotenoid Reflectance Index 2             | CRI2    | $\frac{1}{R_{510}} - \frac{1}{R_{700}}$                        |
| Normalized Difference Water Index 1        | NDWI1   | $\frac{R_g - R_{nir}}{R_g + R_{nir}}$                          |
| Normalized Difference Water Index 2        | NDWI2   | $\frac{R_{nir} - R_{far}}{R_{nir} + R_{far}}$                  |
| Modified Normalized Difference Water Index | MNDWI   | $\frac{R_g - R_{far}}{R_g + R_{far}}$                          |
| Water Band Index                           | WBI     | $\frac{970}{900} R_g$                                          |
| Anthocyanin Content Index                  | ACI     | $\frac{R_{nir}}{R_{nir}}$                                      |
| Chlorophyll Index Red Edge                 | CIre    | $\frac{R_{705}}{R_{705}} - 1$                                  |
| Modified Anthocyanin Reflectance Index     | MARI    | $\left( \frac{1}{R_{550}} - \frac{1}{R_{700}} \right) R_{nir}$ |
| Moisture Stress Index                      | MSI     | $\frac{R_{far}}{R_{nir}}$                                      |
| MERIS Terrestrial Chlorophyll Index        | MTCI    | $\frac{R_{753.75} - R_{708.75}}{R_{708.75} - R_{681.25}}$      |
| Normalzied Difference Infrared Index       | NDII    | $\frac{R_{nir} - R_{far}}{R_{nir} + R_{far}}$                  |
| Normalized Difference Red Edge             | NDRE    | $\frac{R_{790} - R_{720}}{R_{790} + R_{720}}$                  |
| Red Green Ratio Index                      | RGRI    | $\frac{R_r}{R_g}$                                              |
| Red Edge Vegetation Stress Index           | RVSI    | $\frac{R_{714} + R_{752}}{2} - R_{733}$                        |
